# Supplementary material for: SARS-CoV-2 infection of human pluripotent stem cell-derived vascular cells reveals smooth muscle cells as key mediators of vascular pathology during infection
Source: PubMed Central journal article supplement — Nat Commun. 2024 Dec 30;15:10754. doi: 10.1038/s41467-024-54917-4 (PMC11685814; doi:10.1038/s41467-024-54917-4), 2024-12-30
Supplement: 41467_2024_54917_MOESM1_ESM.pdf [file 41467_2024_54917_MOESM1_ESM.pdf]

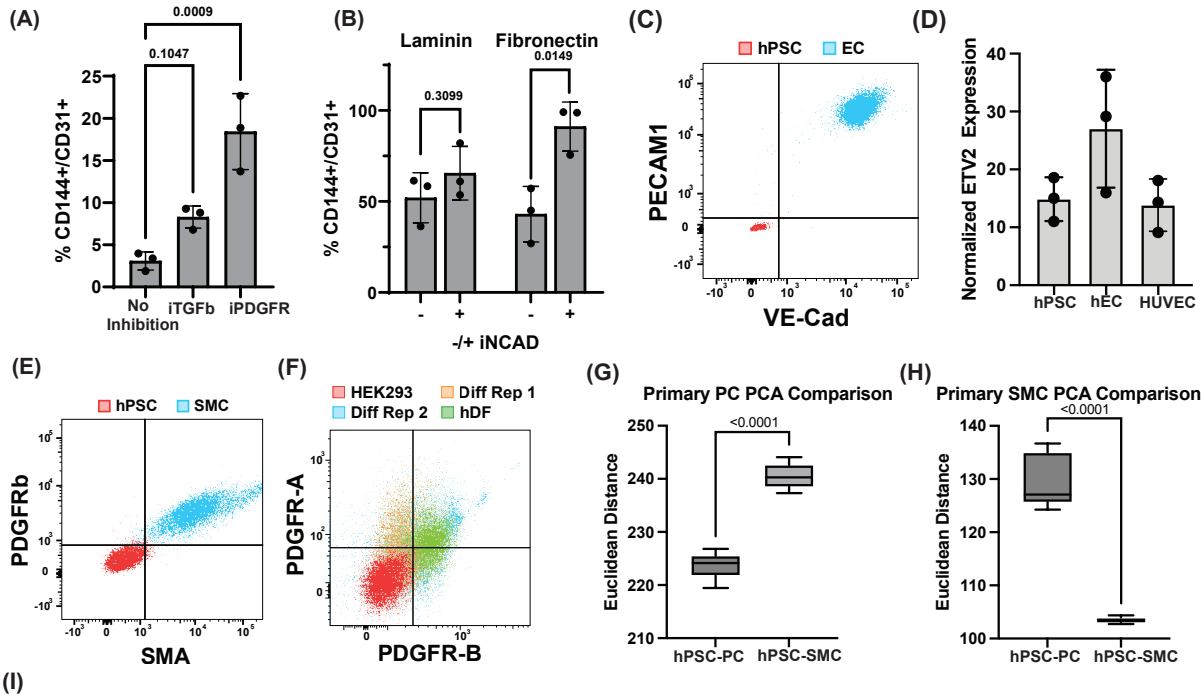

(I)

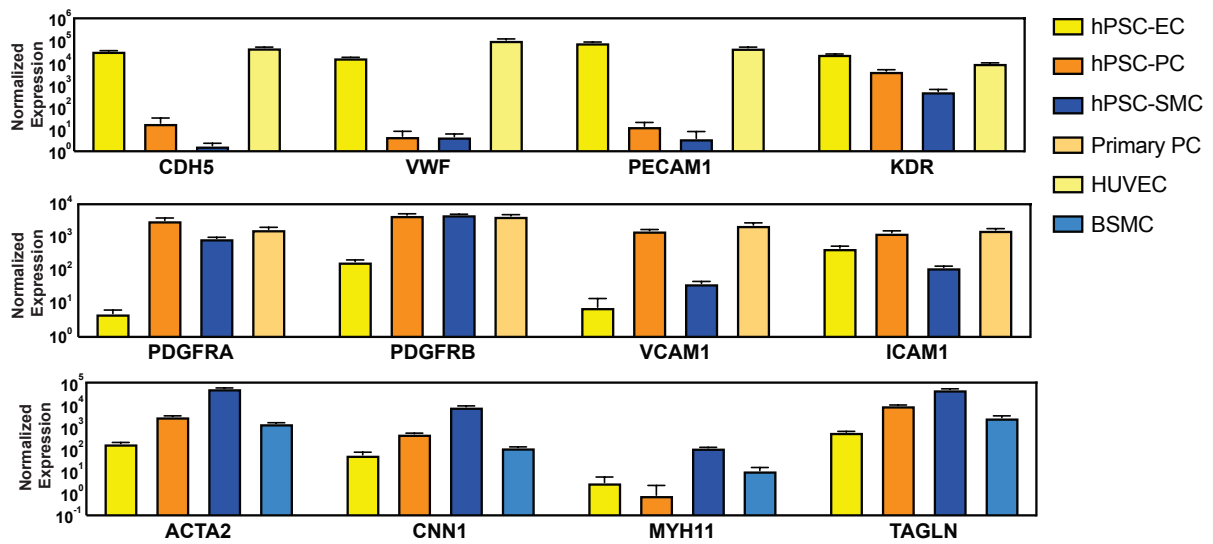

(J)

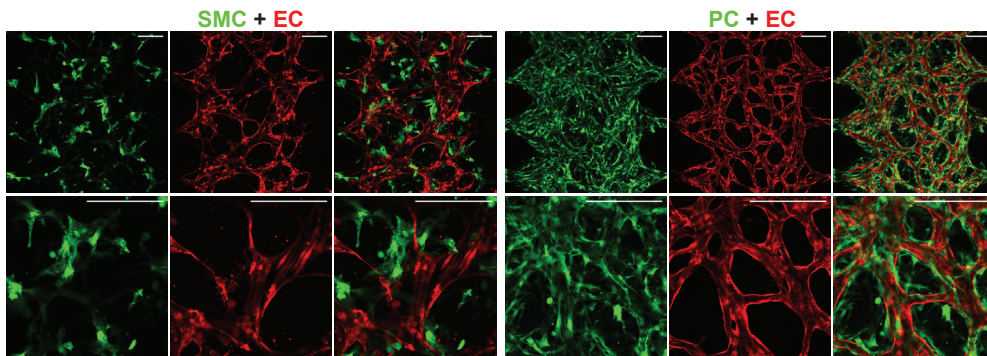

**Supplemental Fig. 1: Characterization of hPSC-derived endothelial cells, pericytes, and smooth muscle cells.** (A) Quantification of EC derivation efficiency by flow cytometry of double-positive PECAM1 and VE-Cad on two replicate differentiations with the dependence of either TGF $\beta$  or PDGFR inhibition. Bar graph shows mean value and error bar shows +/- SD. Conditions were compared using a one-way ANOVA with Dunnett's multiple comparisons test, with a single pooled variance (B) Quantification of EC derivation efficiency by flow cytometry of double-positive PECAM1 and VE-Cad with the dependence of passaging on fibronectin or laminin and with or without N-cadherin inhibition (+/- iNCAD). Bar graph shows mean value and error bar shows +/- SD. Experimental conditions were compared using multiple unpaired t tests with the two-stage linear step-up procedure of Benjamini, Krieger, and Yekutieli (BKY). (C) Representative flow cytometry dot plot of double-positive PECAM1 and VE-Cad expression after purification, expansion, cryopreservation, and thawing of hPSC-derived ECs. (D) Normalized ETV2 RNA expression in hSPC-derived ECs, hPSCs, and primary HUVECs (E) Representative flow cytometry dot plot of double-positive PDGFRb and SMA expression after purification, expansion, cryopreservation, and thawing of hPSC-derived SMCs. (F) Representative flow cytometry dot plot of double-positive PDGFR-B and PDGFR-A expression after purification, expansion, cryopreservation, and thawing of hPSC-derived PCs. (G) Euclidean distance between Primary PCs and hPSC-derived PCs or hPSC-derived SMCs. Center line represents the median value of 240.3 for hPSC-SMC comparison and 224.1 for hPSC-PC comparison. (H) Euclidean distance between Primary BSMCs and hPSC-derived PCs or hPSC-derived SMCs. Center line represents the median value of 103.4 for hPSC-SMC comparison and 127.1 for hPSC-PC comparison (I) Normalized ENA expression of EC marker genes (top), PC marker genes (middle), and SMC marker genes (bottom). Values are average expression levels for three separate differentiations of all hPSC-derived cells. For primary cells (HUVEC, BSMC, and Primary PC) values are average expression from RNA isolated from three separate cultures. (J) Images of mSCarlett-tagged hPSC derived ECs and GFP-tagged hPSC-derived SMCs or PC seeded in microfluidic chambers. The experiment was performed twice with similar results. Representative images from a single experiment are shown.

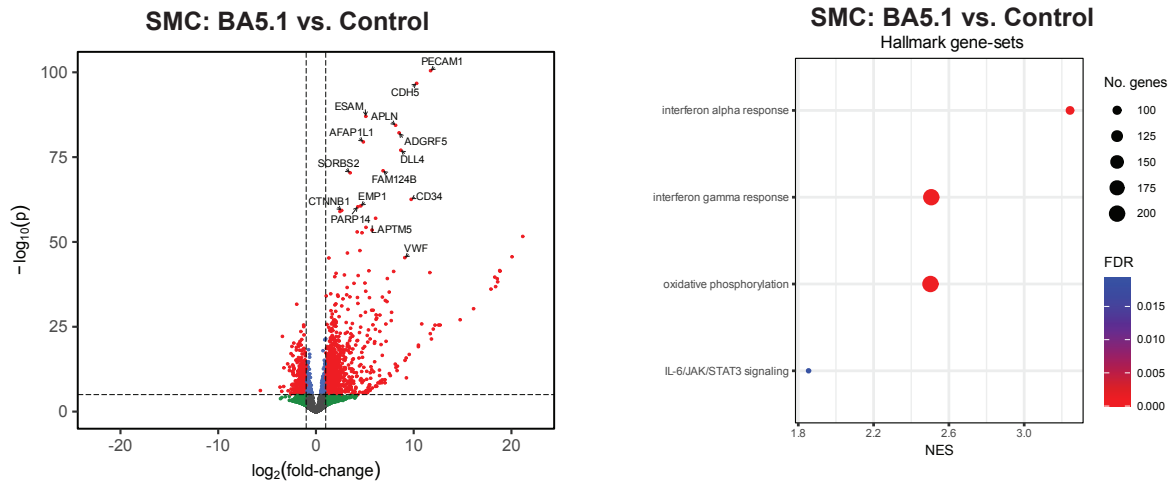

**Supplemental Fig. 2: Exposure of SMCs to the Omicron (BA5.1) variant activates inflammatory signaling.** hPSC-derived SMCs were infected with the Omicron variant (BA5.1) at an MOI of 1. Bulk RNA sequencing was performed on RNA isolated from hPSC-derived SMCs 48 hours after virus exposure. Volcano plots showing differential gene expression compared to control uninfected SMCs. Gene set enrichment analysis (GSEA)<sup>76</sup> was performed on differentially expressed genes to analyze the transcriptional response to infection. Dot plots show gene-sets from the Hallmark collection<sup>34</sup> of the MSigDB that were enriched (FDR < 0.05).

(A)

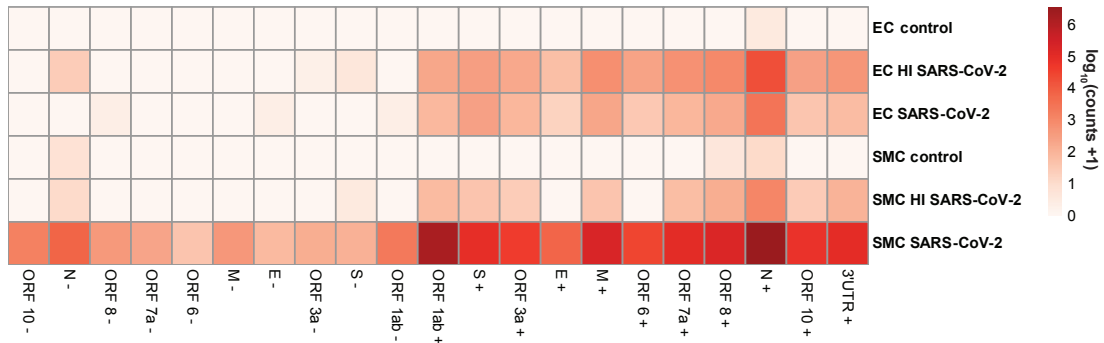

(B)

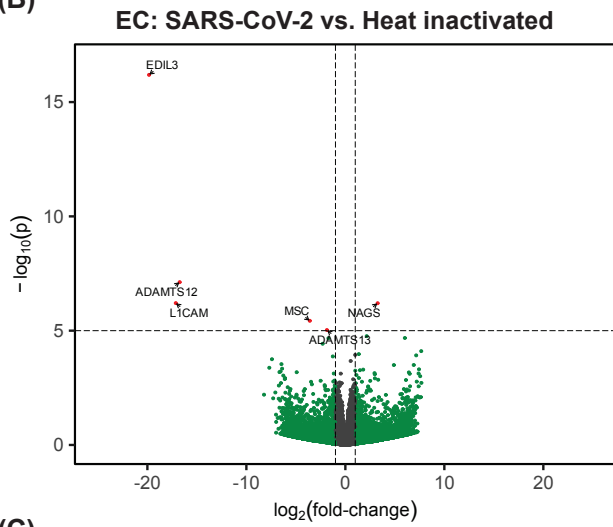

**EC: SARS-CoV-2 vs. Heat inactivated**  
Hallmark gene-sets

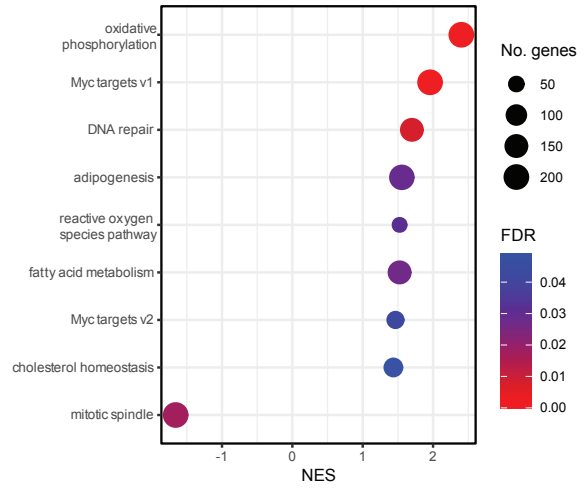

(C)

**EC: SARS-CoV-2 Spike vs. Unexposed**  
Hallmark gene-sets

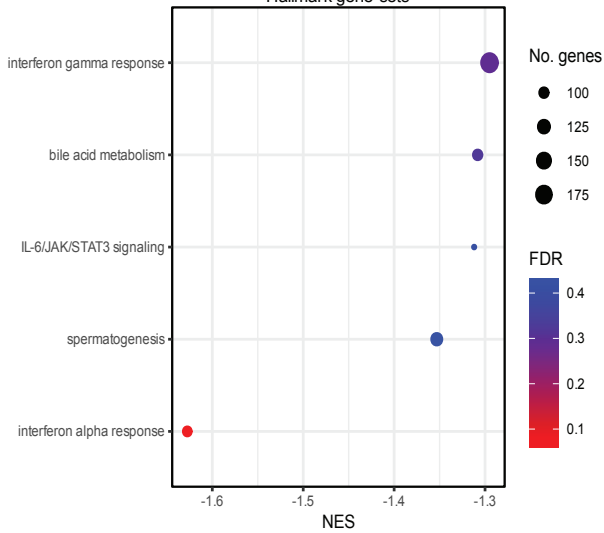

**EC: SARS-CoV-2 Nucleocapsid vs. Unexposed**  
Hallmark gene-sets

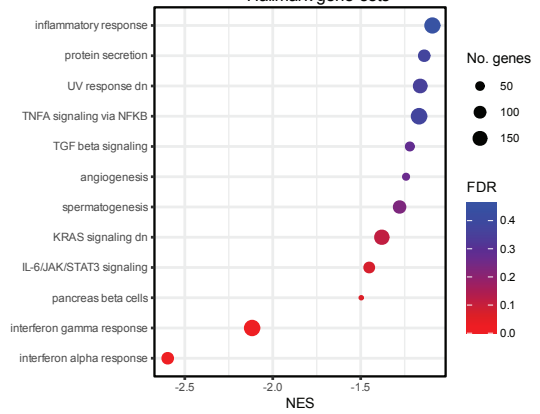

**Supplemental Fig. 3: EC exposure to SARS-CoV-2 results in induction of metabolic and reactive oxygen species pathways.** (A) Heatmap representation of mRNA levels for the ORFs of SARS-CoV-2<sup>77</sup> in each sample. The counts are visualized as  $\log_{10}(\text{counts} + 1)$  where the counts are DESeq2 normalized counts. Values shown are the averaged value of two independent experiments. (+) indicates positive sense mRNA, (-) indicates negative sense mRNA. (B) hPSC derived ECs were exposed to live SARS-CoV-2 (MOI=1) or heat-inactivated SARS-CoV-2. Bulk RNA sequencing was performed on RNA isolated at 48 hours post exposure. Volcano plots showing differential gene expression ECs exposed to live SARS-CoV-2 vs heat-inactivated SARS-CoV-2. Dot plots show gene-sets from the Hallmark collection<sup>34</sup> of the MSigDB that were enriched (FDR < 0.05) using gene-set enrichment analysis (GSEA)<sup>76</sup>. A full list of differentially expressed genes can be found in the Source Data file. (C) Bulk RNA sequencing was performed on RNA isolated from hPSC-derived ECs 48 hours after exposing cells to purified SARS-CoV-2 spike or nucleocapsid proteins. Gene set enrichment analysis was performed on sequenced samples. Dot plots show gene-sets from the Hallmark collection<sup>34</sup>.

(A)

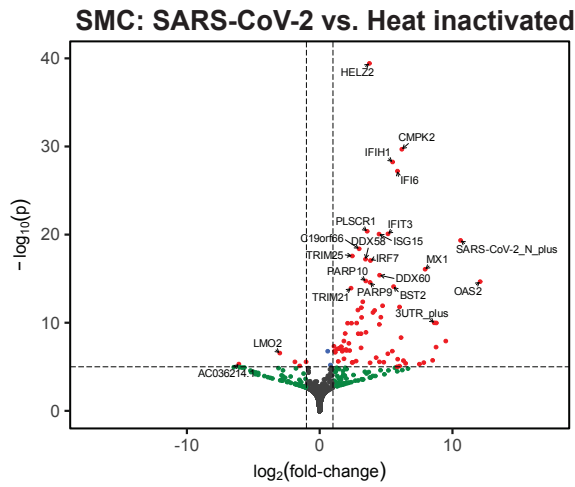

### SMC: SARS-CoV-2 vs. Heat inactivated

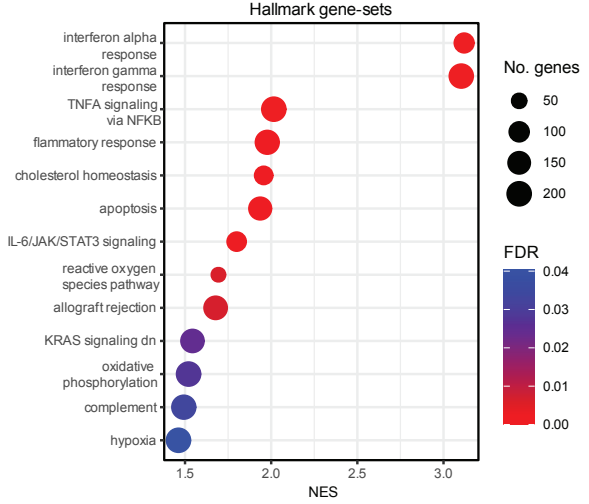

(B)

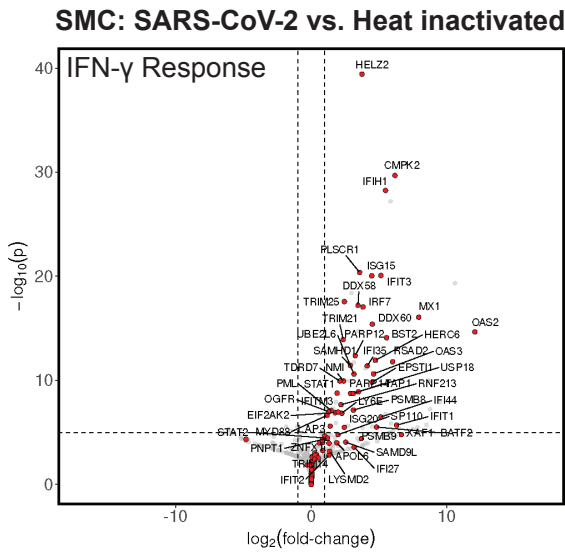

### SMC: SARS-CoV-2 vs. Heat inactivated

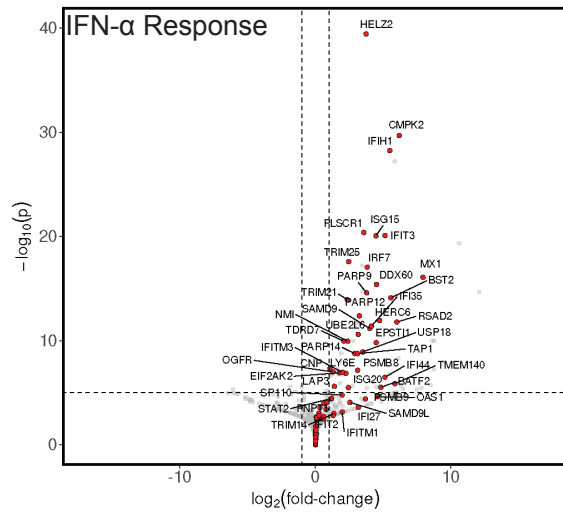

(C)

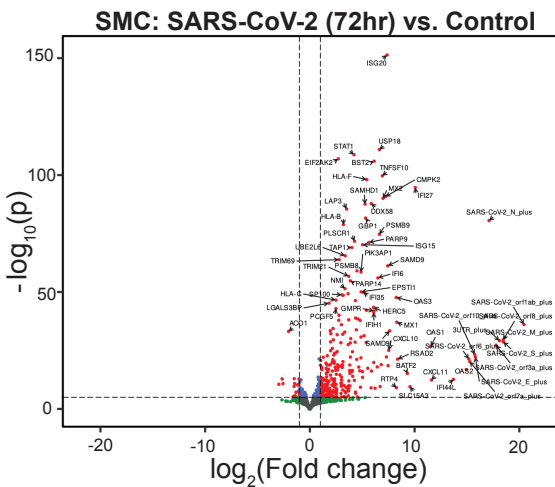

### SMC: SARS-CoV-2 (72hr) vs. Control

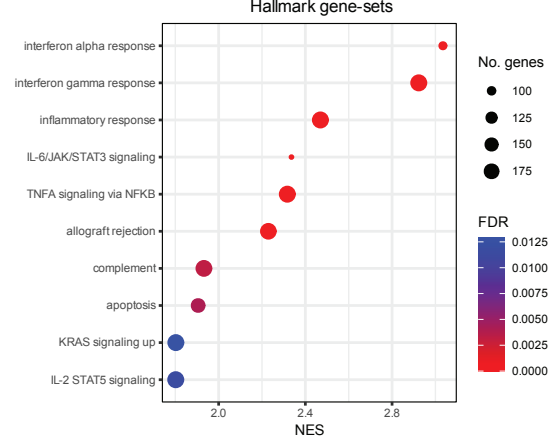

**Supplemental Fig. 4: Productive SARS-CoV-2 infection results in amplification of inflammatory signaling in hPSC-derived SMCs.** The transcriptional responses of hPSC-derived SMCs following addition of live SARS-CoV-2 (MOI=1) or an equal volume of heat-inactivated SARS-CoV-2 were examined by bulk-RNA sequencing 48 hours after virus exposure. A full list of differentially expressed genes can be found in the Source Data file. **(A)** Volcano plots showing differential gene expression in SMCs exposed to live SARS-CoV-2 or heat-inactivated SARS-CoV-2. Dot plots show gene-sets from the Hallmark collection<sup>34</sup> of the MSigDB that were enriched (FDR < 0.05) using gene-set enrichment analysis (GSEA)<sup>76</sup> **(B)** The volcano plots show genes that are differentially expressed in SMCs exposed to live SARS-CoV-2 compared to SMCs exposed to heat-inactivated SARS-CoV-2 and highlight the “IFN- $\gamma$  response” (left) and “IFN- $\alpha$  response” (right) gene-sets from the Hallmark collection<sup>34</sup> of the MSigDB. Genes that are highlighted in red belong to the respective interferon response gene-set, with GSEA “leading edge” genes labeled by name. **(C)** Bulk RNA sequencing was performed on RNA isolated from hPSC-derived SMCs 72 hours after exposure to live SARS-CoV-2 (MOI=1). Volcano plots showing differential gene expression compared to control uninfected SMCs. Gene set enrichment analysis (GSEA)<sup>76</sup> was performed on differentially expressed genes to analyze the transcriptional response to infection. Dot plots show gene-sets from the Hallmark collection<sup>34</sup> of the MSigDB that were enriched (FDR < 0.05).

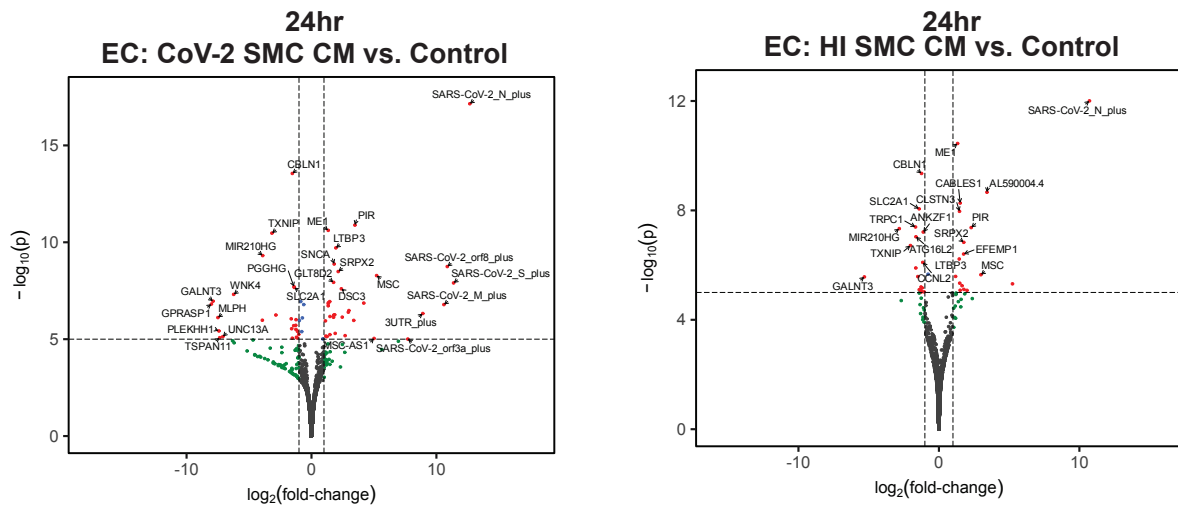

**Supplemental Fig. 5: Early response of ECs to factors secreted from SARS-CoV-2 exposed SMCs:** Bulk RNA sequencing was performed on RNA isolated from ECs 24 hours after exposure to SMC-conditioned media (Figure 4A). The volcano plots show genes that are differentially expressed in ECs exposed to media from SARS-CoV-2 infected SMCs (*CoV-2 SMC CM*) (left) compared to control ECs (*Control*) and ECs exposed to media from SMCs exposed to heat-inactivated SARS-CoV-2 (*HI SMC CM*) compared to control ECs (*Control*) (*right*). A full list of differentially expressed genes can be found in the Source Data file.



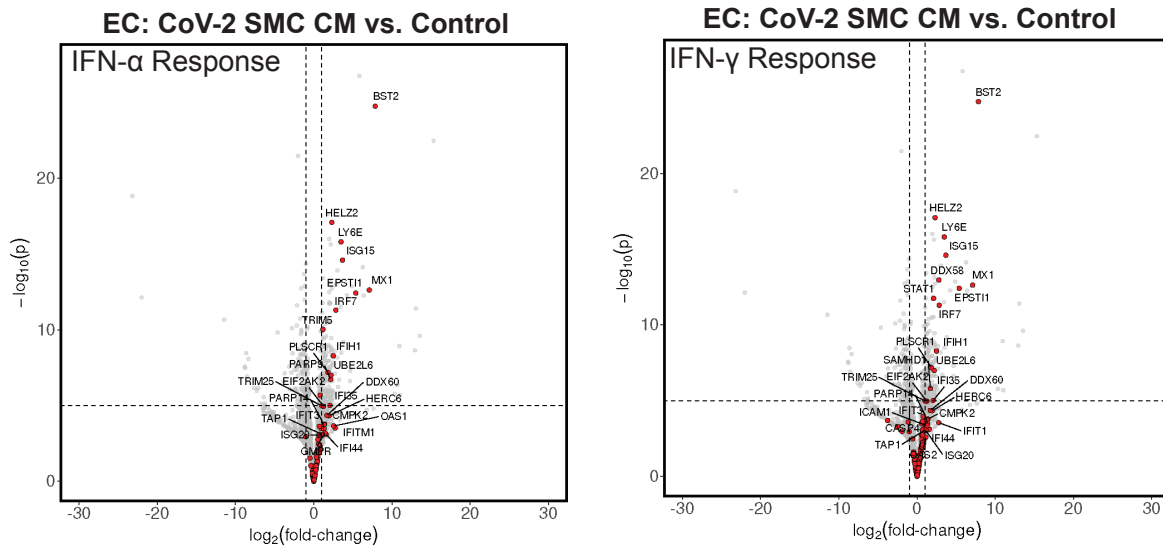

**Supplemental Fig. 6: SARS-CoV-2 infected SMCs release factors that promote inflammatory signaling in ECs.** Bulk RNA sequencing was performed on RNA isolated from ECs 48 hours after exposure to SMC-conditioned media (Figure 4A) as well control ECs. Genes from the “IFN- $\alpha$ response” (left) and “IFN- $\gamma$  response” (right) gene-sets of the MSigDB’s Hallmark collection<sup>34</sup> are highlighted in red, with GSEA “leading edge” genes indicated by name.

(A)

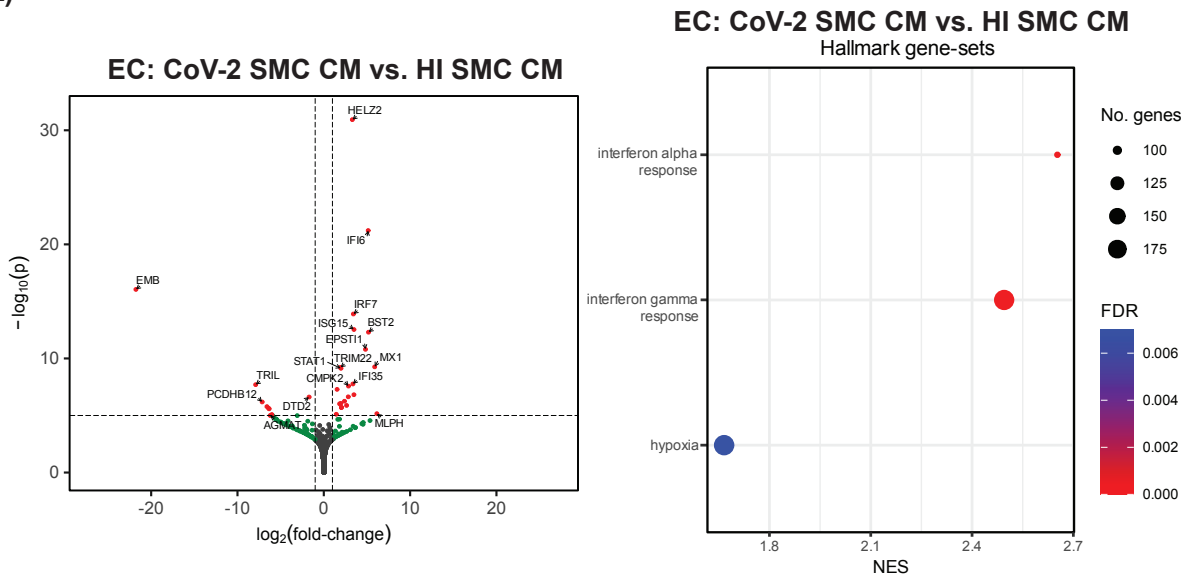

(B)

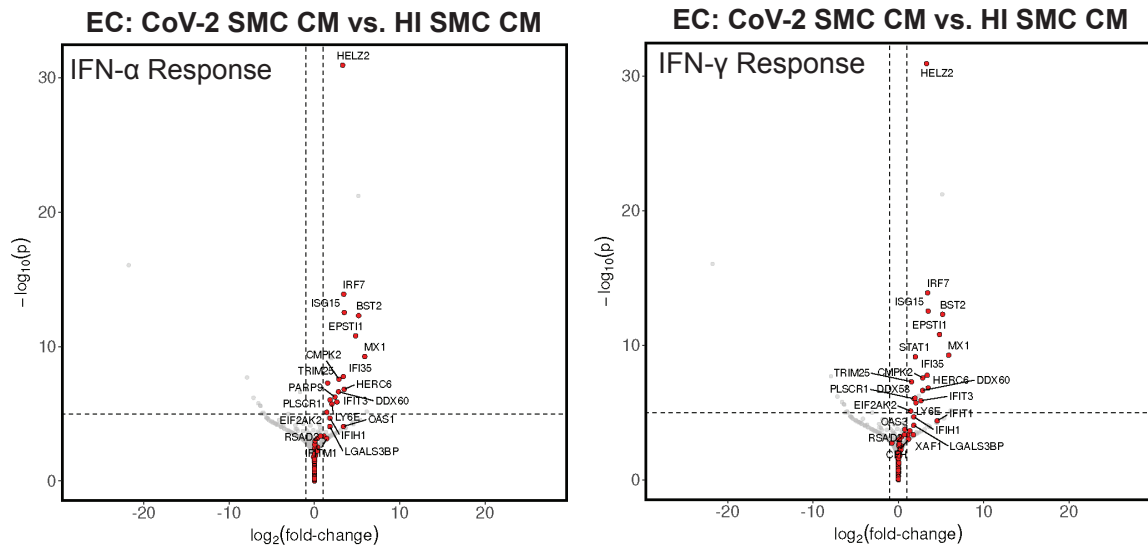

**Supplemental Fig 7: SARS-CoV-2 infection of SMCs amplifies the release of factors the promote inflammatory signaling in ECs.** Bulk RNA sequencing was performed on RNA isolated from ECs 48 hours after exposure to media from SMCs infected with SARS-CoV-2 or exposed to media from SMCs treated with heat-inactivated SARS-CoV-2 (A) Volcano plots showing differential gene expression. Dot plots show gene-sets from the Hallmark collection<sup>34</sup> of the MSigDB that were enriched (FDR < 0.05) using gene-set

enrichment analysis (GSEA) **(B)** The volcano plots highlight the “IFN- $\alpha$  response” (left) and “IFN- $\gamma$  response” (right) gene-sets from the Hallmark collection<sup>34</sup> of the MSigDB. Genes that are highlighted in red belong to the respective interferon response gene-set, with GSEA “leading edge” genes labeled by name.

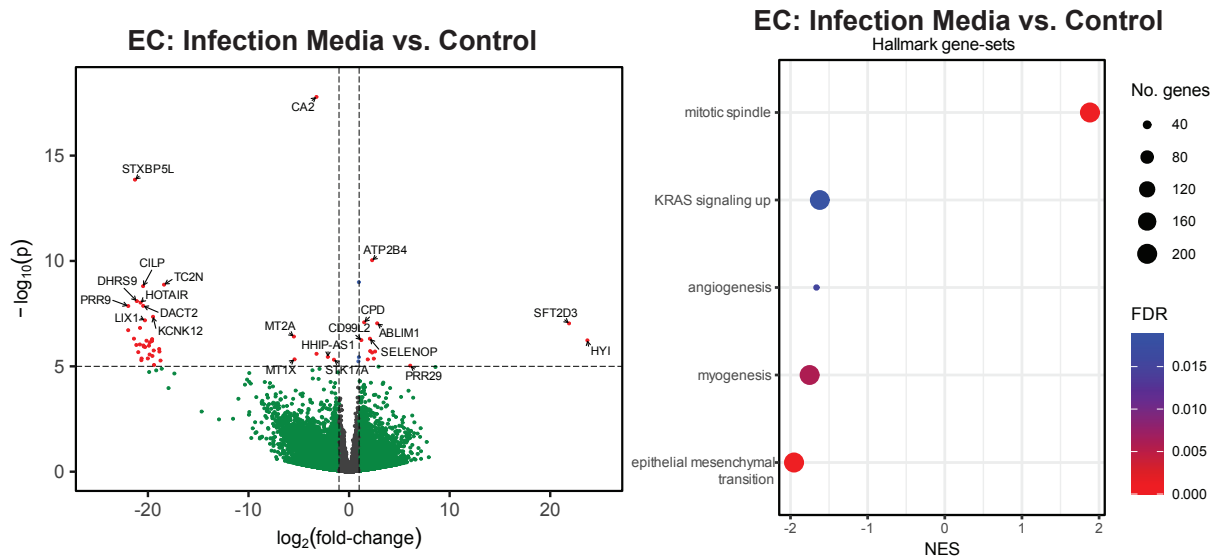

**Supplemental Fig 8: Exposure of ECs to SMC infection media does not induce inflammatory signaling.** ECs were treated with the media used for SMCs infections (Infection media) for 48 hours or maintained in their standard media. RNA was isolated and sequenced by bulk RNA sequencing. Volcano plots showing differential gene expression. Dot plots show gene-sets from the Hallmark collection<sup>32</sup> of the MSigDB that were enriched (FDR < 0.05) using gene-set enrichment analysis (GSEA)<sup>76</sup>. A full list of differentially expressed genes can be found in the Source Data file.

(A)

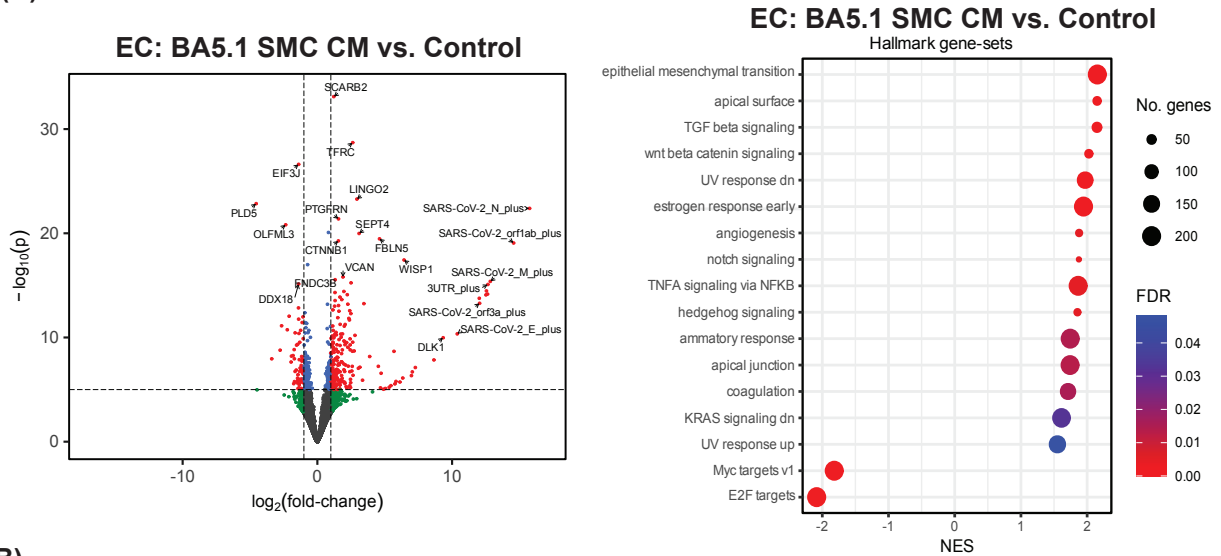

(B)

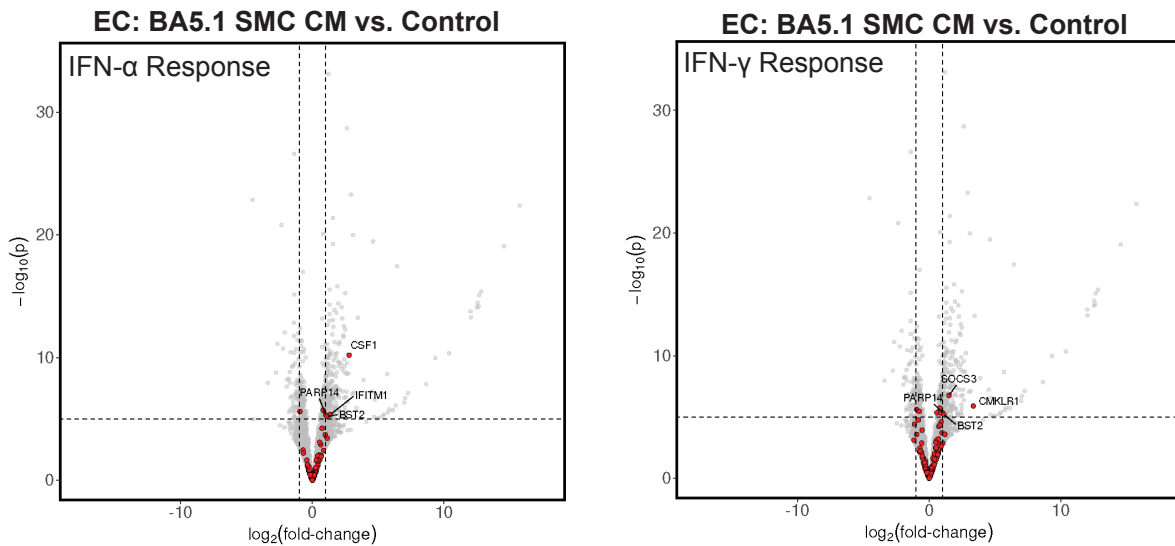

**Supplemental Fig 9: Paracrine signaling from BA5.1 infected SMCs does not induce significant inflammatory signaling in ECs.** Bulk RNA sequencing was performed on RNA isolated from ECs 48 hours after exposure to media from SMCs infected with the BA5.1 variant (MOI=1) (*BA5.1 SMC CM*) or control ECs (*Control*). **(A)** (left) Volcano plots showing differential gene expression. (Right) Dot plots show gene-sets from the Hallmark collection<sup>34</sup> of the MSigDB that were enriched (FDR < 0.05) using gene-set enrichment analysis (GSEA). **(B)** Volcano plots with the genes from the “IFN- $\alpha$  response” (left) and

“IFN- $\gamma$  response” (right) gene-sets of the MSigDB’s Hallmark collection<sup>34</sup> are highlighted in red, with GSEA “leading edge” genes indicated by name.

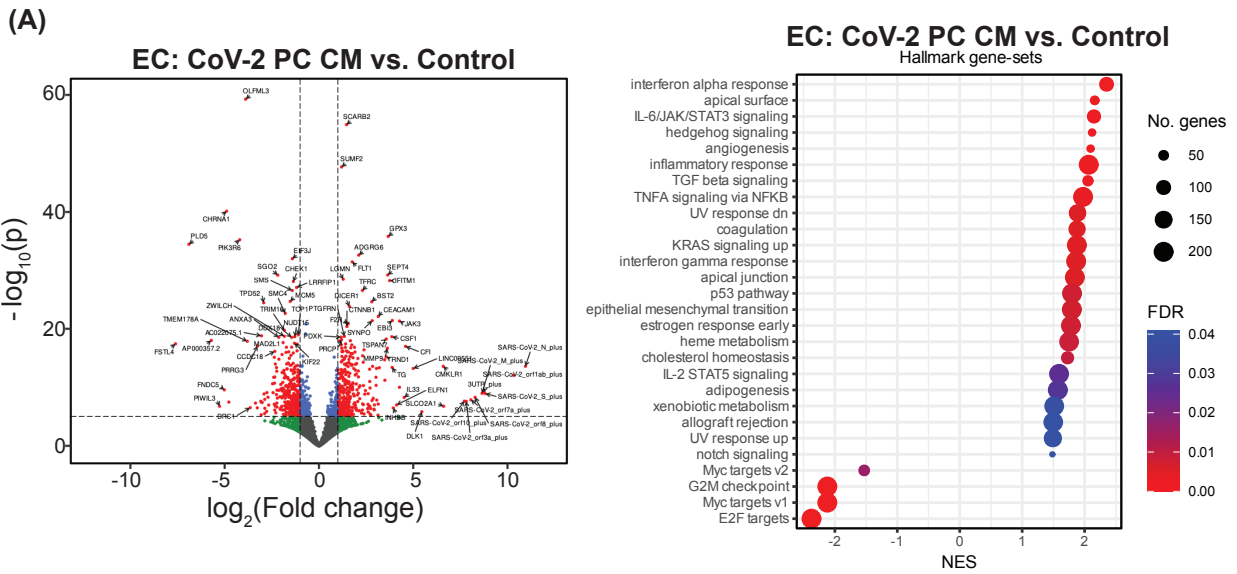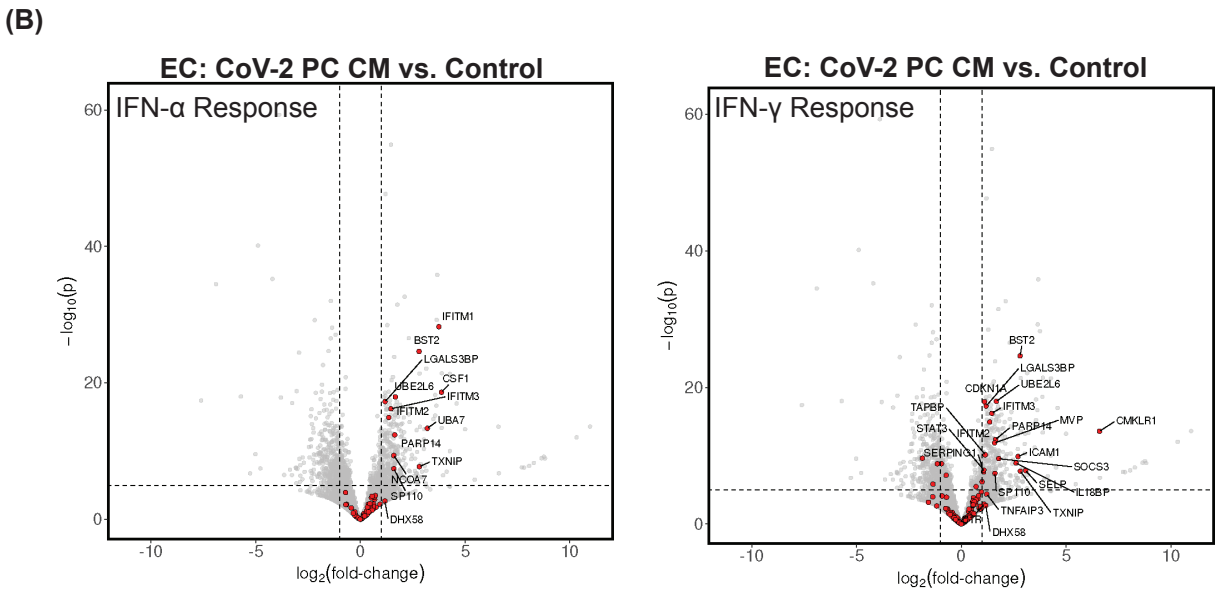

**Supplemental Fig 10: SARS-CoV-2 infected PCs release factors that promote inflammatory signaling in ECs.** Bulk RNA sequencing was performed on RNA isolated from ECs 48 hours after exposure PC-conditioned media. **(A)** ECs exposed to media from SARS-CoV-2 infected SMCs (*CoV-2 PC CM*) compared to control ECs (*Control*). Volcano plots showing differential gene expression. Dot plots show gene-sets from the Hallmark

collection<sup>34</sup> of the MSigDB that were enriched (FDR < 0.05) using gene-set enrichment analysis (GSEA) (**B**) Genes from the “IFN- $\alpha$  response” (left) and “IFN- $\gamma$  response” (right) gene-sets of the MSigDB’s Hallmark collection<sup>34</sup> are highlighted in red, with GSEA “leading edge” genes indicated by name.



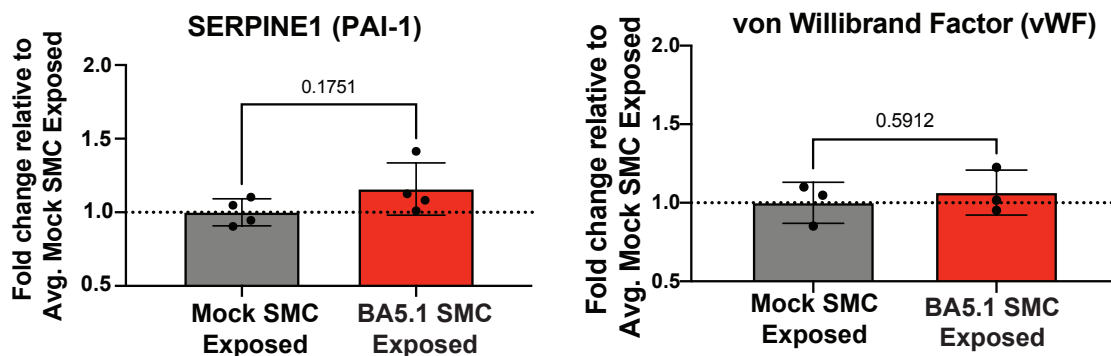

**Supplemental Fig. 11: Exposure of ECs to media from BA5.1 infected SMCs does not promote release of vWF or SERPINE1.** Quantitation of SERPINE1(PAI-1) and von Willebrand factor (vWF) in the media of ECs exposed to media from BA5.1 infected SMCs (*BA5.1 SMC Exposed*) for 48 hours or ECs exposed to media from mock infected SMCs (*Mock SMC Exposed*) for 48 hours. Four independent experiments were analyzed for SERPINE1 quantitation. Three independent experiments were analyzed for vWF quantitation. All values were plotted as fold change relative to the average value for *Mock SMC Exposed* samples). Bar graph shows mean value and error bar shows +/- SD. Conditions were compared using an unpaired t-test.

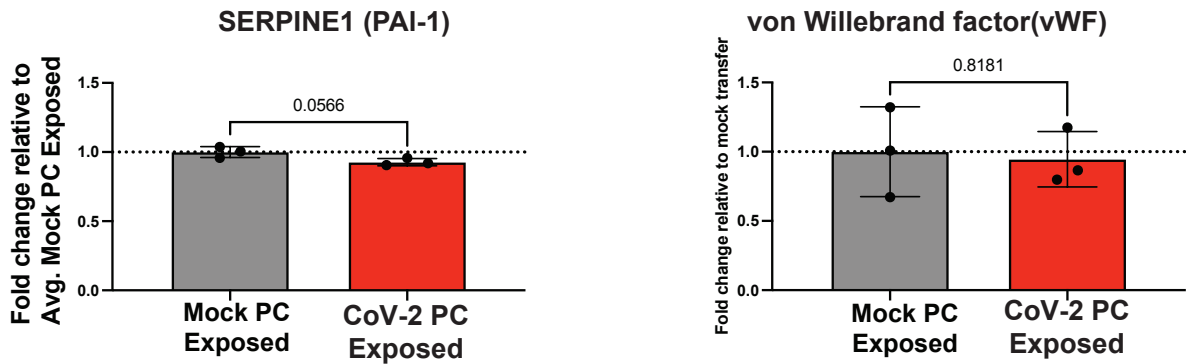

**Supplemental. Fig. 12: Exposure of ECs to media from SARS-CoV-2 infected PCs does not promote the release of vWF or SERPINE1.** Quantitation of SERPINE1(PAI-1) and von Willebrand factor (vWF) in the media of ECs exposed to media from SARS-CoV-2 infected PCs (*CoV-2 PC Exposed*) for 48 hours or exposed to media from mock infected PCs (*Mock PC Exposed*) for 48 hours. Three independent experiments were analyzed and results are expressed as a fold change relative to the average value recorded from *Mock PC Exposed* samples). Bar graph shows mean value and error bar shows +/- SD. Conditions were compared using an unpaired t-test.

(A)

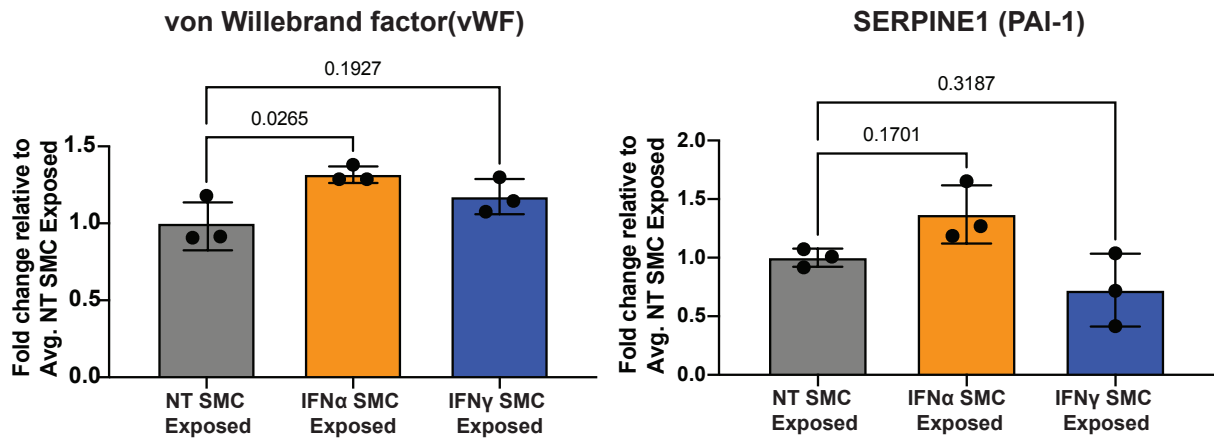

(B)

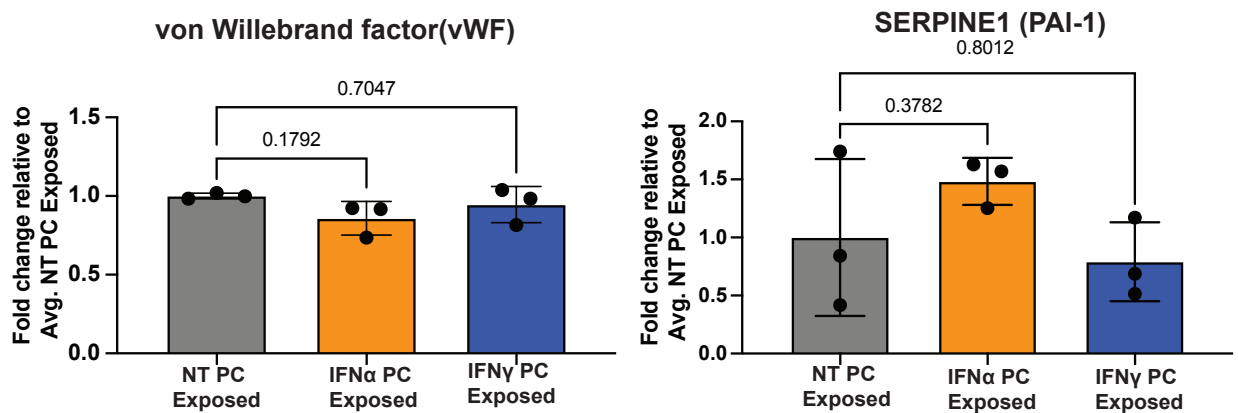

**Supplemental Fig. 13: Activation of inflammatory signaling in SMCs results in the release of factors that promote clotting cascades in ECs. (A)** hPSC derived SMCs were treated with 100U/ml IFN $\alpha$  or 20ng/ml IFN $\gamma$  for 24 hours, cells were then washed twice and fresh media without IFN- $\alpha$  or IFN- $\gamma$  was added. Media was then collected after 24 hours and added to hPSC derived ECs. Levels of vWF or SERPINE1 in the media were measured 48 hours later. Values from three independent experiments were used for vWF quantitation. Values from five independent experiments were used for SERPINE1 quantitation. All values are reported as a fold change relative to the average value for ECs treated with media from untreated SMCs (NT SMC Exposed). Bar graph shows mean value and error bar shows +/- SD. Conditions were compared using a one-way

ANOVA with Dunnett's multiple comparisons test, with a single pooled variance. **(B)** hPSC derived PCs were treated with 100U/ml IFN $\alpha$  or 20ng/ml IFN- $\gamma$  for 24 hours, cells were then washed twice and fresh media without IFN- $\alpha$  or IFN $\gamma$  was added. Media was then collected after 24hours and added to hPSC derived ECs. Levels of SERPINE1 or vWF in the media were measured 48 hours later. Three independent experiments were analyzed for vWF quantitation. Values from five independent experiments were used for SERPINE1 quantitation. All values are reported as a fold change relative to the average value for ECs treated with media from untreated PCs (NT PC Exposed). Bar graph shows mean value and error bar shows +/- SD. Conditions were compared using a one-way ANOVA with Dunnett's multiple comparisons test, with a single pooled variance.

(A)

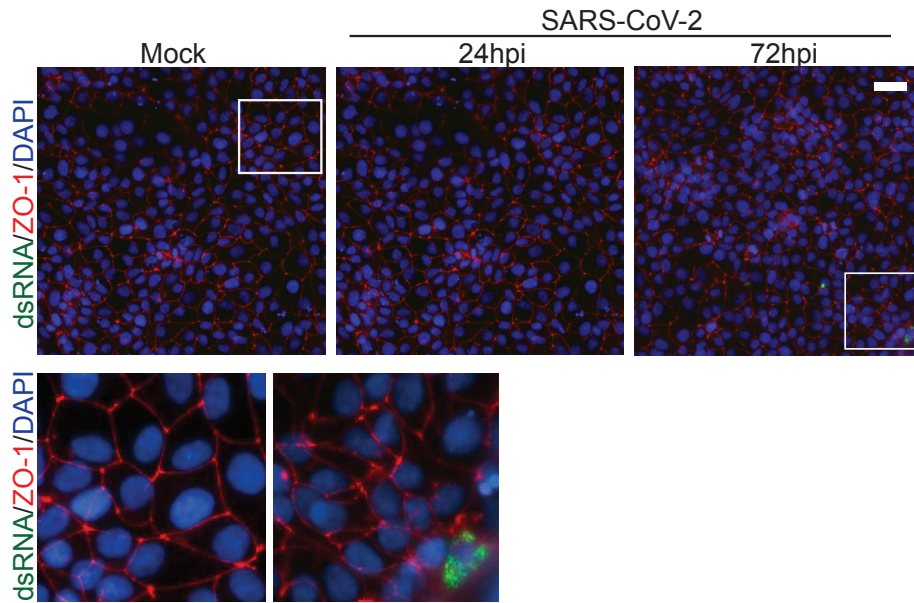

### Brain Microvascular Permeability

(B)

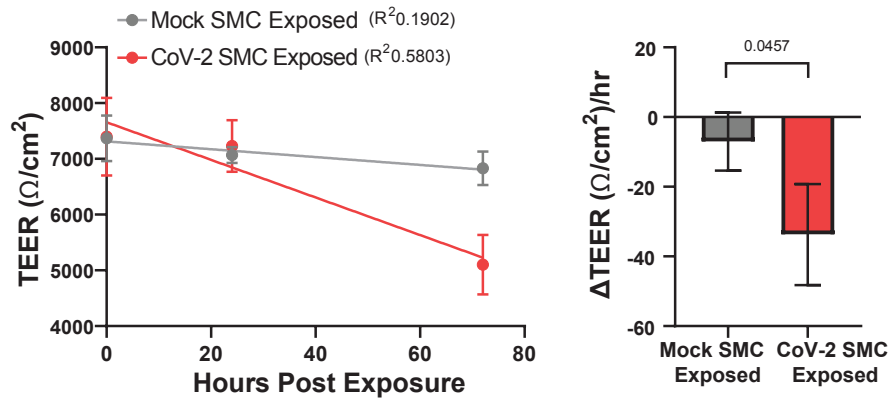

(C)

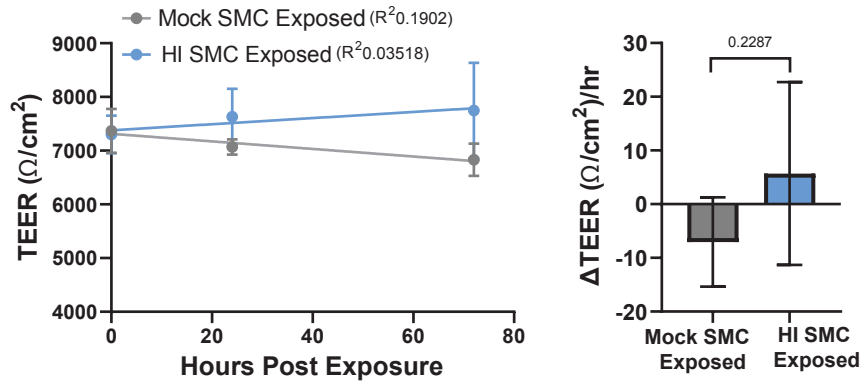

**Supplemental Fig. 14: Exposure of hPSC-derived brain microvascular cells to SARS-CoV-2 or to media conditioned by SARS-CoV-2 infected SMCs.** **(A)** hPSC-derived brain microvascular endothelial cells (hBMECs) were exposed to live SARS-CoV-2 (MOI=0.1) for 24hr or 72hr hours. Cells were fixed and stained for the endothelial cell marker ZO-1 and dsRNA to detect viral replication. Lower images are enlarged images of regions highlighted by white boxes. The experiment was performed twice with similar results. Representative images from a single experiment are shown. **(B)** hBMECs were plated in trans-well plates and exposed to media from SMCs treated with heat-inactivated SARS-CoV-2 (HI) or media from uninfected SMCs (*Control*). Trans-endothelial cell electrical resistance (TEER) was measured at 0, 24, and 72 hours after exposure. **(C)** Trans-endothelial cell electrical resistance (TEER) was measured at 0, 24, and 72 hours after exposure of hPSC-derived brain microvascular endothelial cells to media from SARS-CoV-2 infected SMCs (*Exposed*) or media from uninfected SMCs (*Control*). For all experiments TEER was measure in three wells for each condition at each time point and the mean with standard deviation plotted.

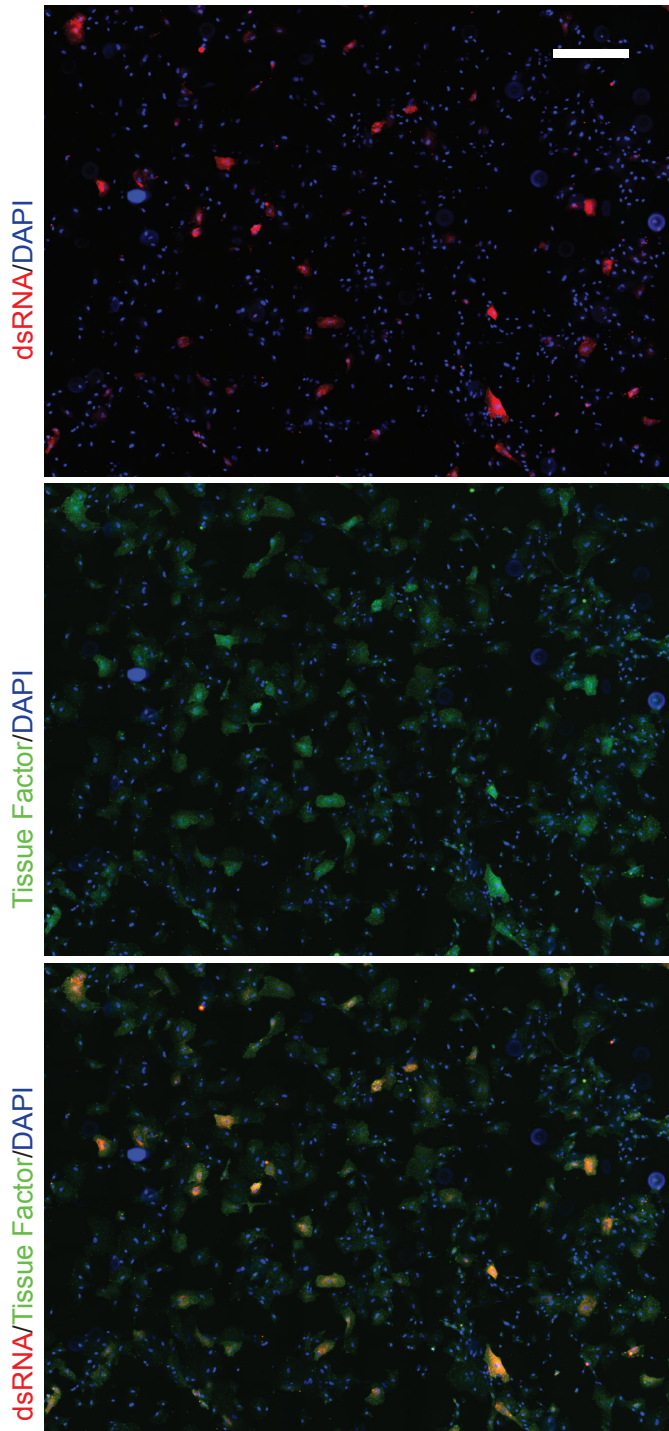

**Supplemental Fig. 15: Tissue factor staining is increased in cells with actively replicating SARS-CoV-2.** Representative immunofluorescence micrograph showing association of TF expression in infected SMCs at 48 hours post infection (MOI=0.1). The

fraction of infected cells was determined by quantitating the number of dsRNA-positive cells and determined to be 15.78% (155/982 DAPI+ cells). Scale bar = 200  $\mu$ m



(A)

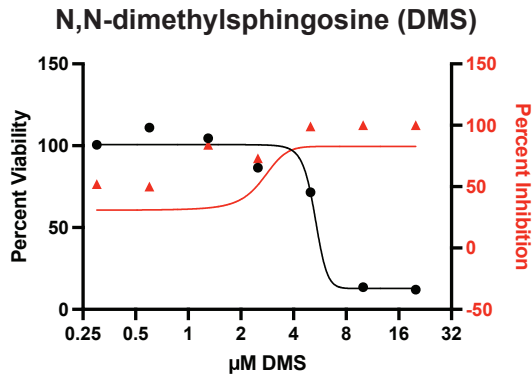

(B)

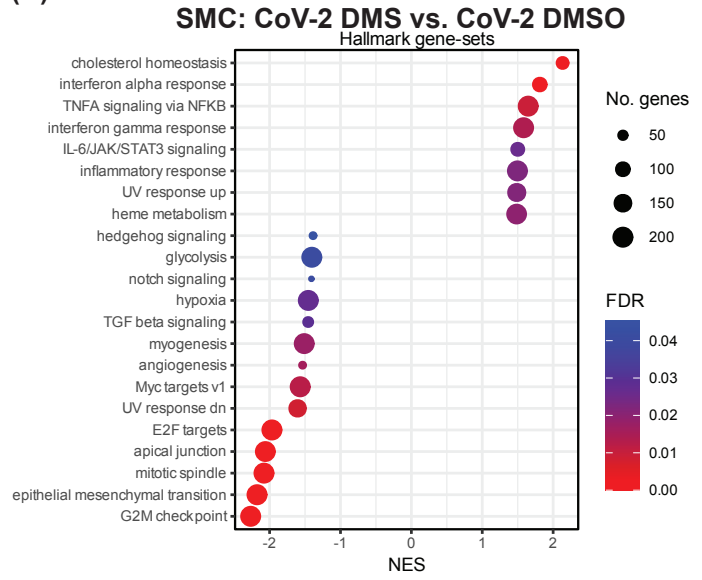

(C)

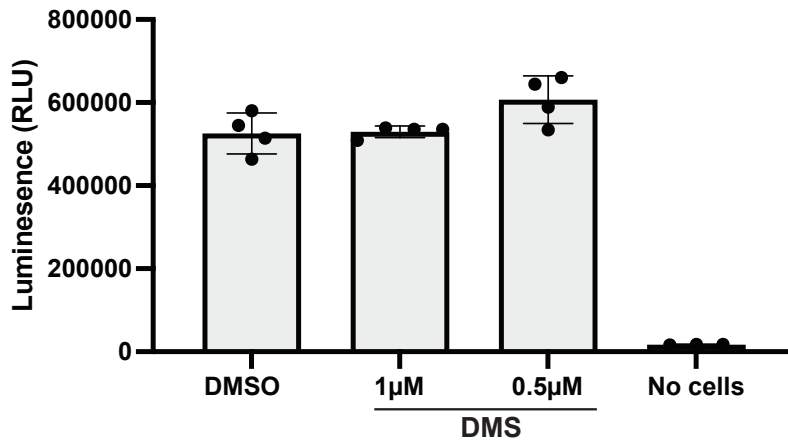

**Supplemental Fig. 16: The SPHK inhibitor N,N-dimethyl-sphingosine reduces SARS-CoV-2 replication in hPSC-derived SMCs.** **(A)** SMCs infected with SARS-CoV-2 (MOI=0.1) were exposed to increasing amounts of N,N-dimethyl-sphingosine (DMS) during infection. The amount of infectious virus released into the media at 48 hours post-infection was quantitated by plaque assay. Cell viability was measured in uninfected SMCs at the corresponding time point and DMS dose. **(B)** Dot plot summary of GSEA comparing SARS-CoV-2 infected SMCs with and without exposure to DMS (1uM) during infect. The Hallmark collection<sup>34</sup> of gene-sets from the MSigDB was used and gene-sets were plotted only when FDR < 0.05 for enrichment in at least one of the between-condition comparisons. **(C)** Viability of ECs following 48 hours of exposure to 1uM or 0.5uM DMS was quantitated by CellTiter Glo assay. Bar graph shows mean value and error bar shows +/- SD.

Supplemental Table 1: Summary of antibodies used in this study

| <b>Primary Antibodies</b>           | <b>Source</b>     | <b>Catalog Number</b> | <b>Dilution</b> |
|-------------------------------------|-------------------|-----------------------|-----------------|
| VE-Cadherin                         | R&D Systems       | AF938                 | 1:250           |
| vWF                                 | Abcam             | ab6994                | 1:250           |
| PECAM1(CD31)                        | Abcam             | ab9498                | 1:250           |
| SMA                                 | Abcam             | ab5694                | 1:200           |
| PDGFR $\beta$                       | Cell Signaling    | 3169S                 | 1:200           |
| NG2                                 | Invitrogen        | 14-6504-82            | 1:200           |
| dsRNA (J2)                          | Novus             | NBP3-11395            | 1:2000          |
| Tissue Factor                       | Abcam             | ab228968              | 1:250           |
| ZO-1                                | Life Technologies | 402200                | 1:200           |
| VE-Cadherin-PE (Flow for EC)        | Invitrogen        | 12-1449-82            | 1:50            |
| PECAM1-AlexaFluor 647 (Flow for EC) | Abcam             | Ab215912              | 1:50            |
| SMA-AlexaFluor 594 (Flow for SMC)   | Cell Signaling    | 36110S                | 1:50            |
| PDGFRb-APC (Flow for SMC)           | Abcam             | Ab119861              | 1:50            |
| NG2-APC (Flow for PC)               | R&D Systems       | FAB2585A              | 1:25            |
| PDGFRb-APC (Flow for PC)            | BioLegend         | 323512                | 1:25            |
| PDGFRa-PE (Flow for PC)             | BioLegend         | 323606                | 1:25            |
| <b>Secondary Antibodies</b>         | <b>Source</b>     | <b>Catalog Number</b> | <b>Dilution</b> |
| Mouse-488                           | Life Technologies | A21202                | 1:1000          |
| Mouse-568                           | Life Technologies | A10037                | 1:1000          |
| Mouse-647                           | Life Technologies | A31571                | 1:1000          |
| Rabbit-488                          | Life Technologies | A21206                | 1:1000          |
| Rabbit-568                          | Life Technologies | A11011                | 1:1000          |

|            |                   |        |        |
|------------|-------------------|--------|--------|
| Rabbit-647 | Life Technologies | A31573 | 1:1000 |
| Goat-488   | Life Technologies | A11055 | 1:1000 |
| Goat-568   | Life Technologies | A11057 | 1:1000 |
| Goat-647   | Life Technologies | A21447 | 1:1000 |

Supplemental Table 2: Media formulations for differentiation and infection media

|                                                               | Final Concentration | Source                   | Catalog #   |
|---------------------------------------------------------------|---------------------|--------------------------|-------------|
| <b>MeIM</b>                                                   |                     |                          |             |
| E6                                                            |                     | Thermo Fisher Scientific | A1516401    |
| L-Ascorbic acid 2-phosphate sesquimagnesium salt hydrate (AA) | 60ug/ml             | Sigma                    | A8960-5G    |
| CHIR 99021                                                    | 8uM                 | Biogems                  | 2520691     |
| BMP4                                                          | 25ng/ml             | Peprotech                | 120-05ET    |
| <b>EC1</b>                                                    |                     |                          |             |
| E6                                                            |                     | Thermo Fisher Scientific | A1516401    |
| Forskolin                                                     | 2nM                 | Biogems                  | 6652995     |
| AA                                                            | 60ug/ml             | Sigma                    | A8960-5G    |
| VEGF                                                          | 200ng/ml            | Peprotech                | 100-20-50µg |
| CP-673451                                                     | 2nM                 | Selleck                  | S1536       |
| SB 431542                                                     | 10uM                | Biogems                  | 3014193     |
| <b>EC2</b>                                                    |                     |                          |             |
| hESFM                                                         |                     | Thermo Fisher Scientific | 11111044    |
| Forskolin                                                     | 2nM                 | Biogems                  | 6652995     |
| AA                                                            | 60ug/ml             | Sigma                    | A8960-5G    |
| VEGF                                                          | 200ng/ml            | Peprotech                | 100-20-50µg |
| CP-673451                                                     | 2nM                 | Selleck                  | S1536       |
| SB 431542                                                     | 10uM                | Biogems                  | 3014193     |
| <b>EC3</b>                                                    |                     |                          |             |
| hESFM                                                         |                     | Thermo Fisher Scientific | 11111044    |
| AA                                                            | 60ug/ml             | Sigma                    | A8960-5G    |
| VEGF                                                          | 200ng/ml            | Peprotech                | 100-20-50µg |
| CP-673451                                                     | 2nM                 | Selleck                  | S1536       |
| SB 431542                                                     | 10uM                | Biogems                  | 3014193     |
| Exherin (ADH-1)                                               | 25ug/ml             | AdooQ BioScience         | A13689      |
| <b>EC4</b>                                                    |                     |                          |             |
| hESFM                                                         |                     | Thermo Fisher Scientific | 11111044    |
| B27                                                           | 1:50                | Thermo Fisher Scientific | 17504044    |
| EGF                                                           | 20ng/ml             | Peprotech                | AF-100-15   |
| Heparin                                                       | 2ug/ml              | StemCell Technologies    | 07980       |
| VEGF                                                          | 20ng/ml             | Peprotech                | 100-20-50µg |
| CP-673451                                                     | 2nM                 | Selleck                  | S1536       |
| SB 431542                                                     | 10uM                | Biogems                  | 3014193     |
| S1P                                                           | 5nM                 | Sigma                    | S9666-1MG   |
| <b>EC5</b>                                                    |                     |                          |             |
| hESFM                                                         |                     | Thermo Fisher Scientific | 11111044    |
| B27                                                           | 1:50                | Thermo Fisher Scientific | 17504044    |
| EGF                                                           | 20ng/ml             | Peprotech                | AF-100-15   |
| Heparin                                                       | 2ug/ml              | StemCell Technologies    | 07980       |

|                        |          |                          |              |
|------------------------|----------|--------------------------|--------------|
| VEGF                   | 20ng/ml  | Peprotech                | 100-20-50µg  |
| bFGF                   | 50ng/ml  | Peprotech                | 100-18B      |
| <b>PC1/SMC1</b>        |          |                          |              |
| E6                     |          | Thermo Fisher Scientific | A1516401     |
| Forskolin              | 2nM      | Biogems                  | 6652995      |
| AA                     | 60ug/ml  | Sigma                    | A8960-5G     |
| VEGF                   | 200ng/ml | Peprotech                | 100-20-50µg  |
| <b>PC2/SMC2</b>        |          |                          |              |
| hESFM                  |          | Thermo Fisher Scientific | 11111044     |
| Forskolin              | 2nM      | Biogems                  | 6652995      |
| AA                     | 60ug/ml  | Sigma                    | A8960-5G     |
| VEGF                   | 200ng/ml | Peprotech                | 100-20-50µg  |
| <b>PC3</b>             |          |                          |              |
| hESFM                  |          | Thermo Fisher Scientific | 11111044     |
| AA                     | 60ug/ml  | Sigma                    | A8960-5G     |
| VEGF                   | 200ng/ml | Peprotech                | 100-20-50µg  |
| SB 431542              | 10uM     | Biogems                  | 3014193      |
| <b>PC4</b>             |          |                          |              |
| hESFM                  |          | Thermo Fisher Scientific | 11111044     |
| B27                    | 1:50     | Thermo Fisher Scientific | 17504044     |
| EGF                    | 20ng/ml  | Peprotech                | AF-100-15    |
| Heparin                | 2ug/ml   | StemCell Technologies    | 07980        |
| SB 431542              | 10uM     | Biogems                  | 3014193      |
| PDGFbb                 | 10ng/ml  | Peprotech                | 100-14B-10UG |
| <b>SMC3</b>            |          |                          |              |
| hESFM                  |          | Thermo Fisher Scientific | 11111044     |
| AA                     | 60ug/ml  | Sigma                    | A8960-5G     |
| VEGF                   | 200ng/ml | Peprotech                | 100-20-50µg  |
| CP-673451              | 2nM      | Selleck                  | S1536        |
| <b>SMC4</b>            |          |                          |              |
| hESFM                  |          | Thermo Fisher Scientific | 11111044     |
| B27                    | 1:50     | Thermo Fisher Scientific | 17504044     |
| EGF                    | 20ng/ml  | Peprotech                | AF-100-15    |
| Heparin                | 2ug/ml   | StemCell Technologies    | 07980        |
| CP-673451              | 2nM      | Selleck                  | S1536        |
| <b>SMC5</b>            |          |                          |              |
| hESFM                  |          | Thermo Fisher Scientific | 11111044     |
| B27                    | 1:50     | Thermo Fisher Scientific | 17504044     |
| EGF                    | 20ng/ml  | Peprotech                | AF-100-15    |
| Heparin                | 2ug/ml   | StemCell Technologies    | 07980        |
| TGFβ                   | 10ng/mlM | Peprotech                | 100-21-500ug |
| <b>Infection Media</b> |          |                          |              |

|         |         |                          |             |
|---------|---------|--------------------------|-------------|
| hESFM   |         | Thermo Fisher Scientific | 11111044    |
| B27     | 1:50    | Thermo Fisher Scientific | 17504044    |
| EGF     | 20ng/ml | Peprotech                | AF-100-15   |
| Heparin | 2ug/ml  | StemCell Technologies    | 07980       |
| VEGF    | 20ng/ml | Peprotech                | 100-20-50µg |
| bFGF    | 50ng/ml | Peprotech                | 100-18B     |

References:

77. Finkel, Y. *et al.* The coding capacity of SARS-CoV-2. *Nature* **589**, 125-130 (2021).
